# Supplementary material for: An improved capillary isoelectric focusing-mass spectrometry method for high-resolution characterization of monoclonal antibody charge variants
Source: Royal Society of Chemistry journal article supplement (doi:10.1039/d1ay01556g), 2021-12-17
Supplement: d1ay01556g1.pdf [file d1ay01556g1.pdf]

## Supporting Information

### **An improved capillary isoelectric focusing-mass spectrometry method for high-resolution characterization of monoclonal antibody charge variants**

Tian Xu<sup>1</sup>, Linjie Han<sup>2</sup>, Alayna M George Thompson<sup>2</sup>, Liangliang Sun<sup>1,\*</sup>

<sup>1</sup> Department of Chemistry, Michigan State University, 578 S Shaw Lane, East Lansing, MI 48824

<sup>2</sup> Global New Biological Entities (NBE), Analytical R&D, AbbVie Inc., 1 Waukegan Rd, North Chicago, IL, 60064

\* Corresponding author. Email: [lsun@chemistry.msu.edu](mailto:lsun@chemistry.msu.edu); Phone: 1-517-353-0498

**Table S1.** Comparison of theoretical and observed masses for the major glycoforms and PTMs in NISTmab, trastuzumab, cetuximab, and mAb1.

| Antibody Name                    | Peak label | Glycoforms and PTMs                       | Theoretical Mass (Da) | Observed Mass (Da) | Mass Error (Da) | Mass Error (ppm) |
|----------------------------------|------------|-------------------------------------------|-----------------------|--------------------|-----------------|------------------|
| NISTmab                          | M          | G0F/G0F                                   | 148037.2              | 148038.0           | 0.8             | 5.4              |
|                                  | B1         | G0F/G0F, +2K                              | 148293.5              | 148294.4           | 0.9             | 5.8              |
|                                  | B2         | G0F/G0F, +1K                              | 148165.4              | 148165.8           | 0.4             | 2.9              |
|                                  | A          | G0F/G0F, +Glycation                       | 148199.3              | 148200.9           | 1.6             | 10.8             |
| Trastuzumab                      | M          | G0F/G0F                                   | 148056.6              | 148059.3           | 2.7             | 18.2             |
|                                  | B          | G0F/G0F+PGK amidation                     | 147998.6              | 147999.4           | 0.8             | 5.4              |
|                                  |            | G0F/G0F+PyroE                             | 148038.6              | 148040.6           | 2.0             | 13.5             |
|                                  | A1         | G0F/G0F, +1Deamidation                    | 148057.6              | 148060.0           | 2.4             | 16.3             |
|                                  | A2         | G0F/G0F, +2Deamidation                    | 148058.6              | 148061.1           | 2.5             | 17.1             |
| Cetuximab                        | M          | Fab: G0F/G0F, Fc: G0F/G0F                 | 151055.1              | 151055.7           | 0.6             | 4.0              |
|                                  | B          | Fab: G0F/G0F, Fc: G0F/G0F, + 1K           | 151183.3              | 151182.8           | -0.5            | -3.1             |
|                                  | A1         | Fab: G0F/G0F, Fc: G0F/G0F, + 1Deamidation | 151056.1              | 151056.8           | 0.7             | 4.7              |
| mAb1                             | M          | G0F/G0F                                   | 147609.4              | 147610.8           | 1.4             | 9.8              |
|                                  | B1         | G0F/G0F, +2K                              | 147975.1              | 147974.6           | -0.5            | -3.2             |
|                                  |            | +1K                                       | 147737.6              | 147738.1           | 0.5             | 3.6              |
|                                  | B2         | G0F/G0F, +PGK amidation                   | 147551.4              | 147551.9           | 0.5             | 3.4              |
|                                  | A1         | G0F/G0F, +2deamidation                    | 147611.4              | 147612.5           | 1.1             | 7.7              |
|                                  | A5         | G0F/G0F, truncation at C224/D225          | 100697.2              | 100697.3           | 0.1             | 0.1              |
|                                  |            | G0F/G0F, truncation at K226/T227          | 100453.9              | 100458.9           | 5.0             | 49.8             |
| G0F/G0F, truncation at H228/T229 |            | 100215.6                                  | 100214.6              | -1.0               | 10.0            |                  |

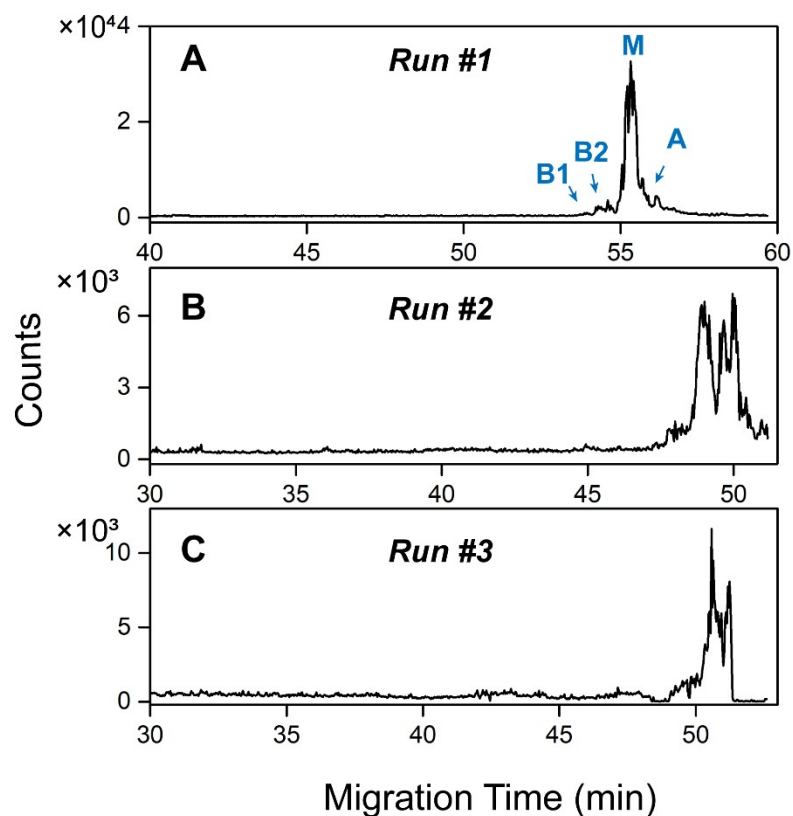

**Figure S1.** Triplicate cIEF-MS runs of NISTmAb with a high pH catholyte (pH 11.6) and an LPA-coated capillary (75 cm). Other parameters for cIEF separation include 12 cm catholyte plug, 63 cm sample plug, 0.2 mg/mL sample concentration, 1.5% (v/v) ampholyte mixture (pH range 3-10 and 8-10.5 with ratio of 1:4), 20 kV separation voltage, 10 mbar pressure at 20 min. The sample cannot focus well after the first cIEF-MS run because of deterioration of capillary coating by the high pH catholyte.

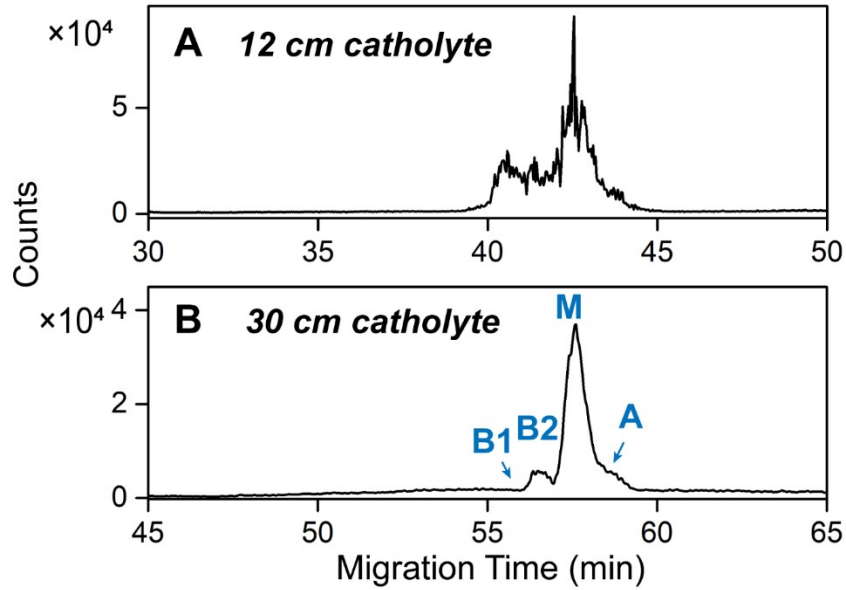

**Figure S2.** Base peak electropherograms of NISTmAb with 12 cm (A) and 30 cm catholyte (pH 10.0) (B). Other parameters for cIEF separation: 0.2 mg/mL sample concentration, 1.5% ampholyte mixture (pH range 3-10 and 8-10.5 with ratio of 1:4), 20 kV separation voltage, 10 mbar pressure applied at 20 min.

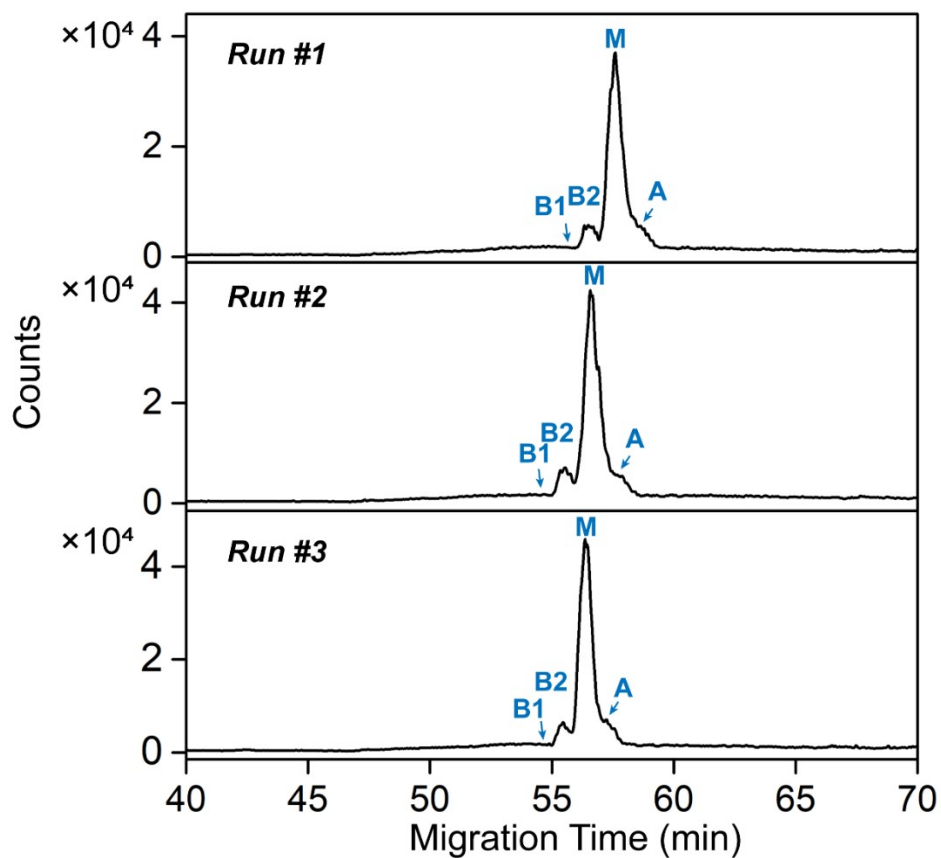

**Figure S3.** Triplicate cIEF-MS runs of NISTmAb with a pH 10.0 catholyte and an LPA-coated capillary (75 cm). Other parameters for cIEF separation were 30 cm catholyte plug, 45 cm sample plug, 0.2 mg/mL sample concentration, 1.5% ampholyte mixture (pH range 3-10 and 8-10.5 with ratio of 1:4), 20 kV separation voltage, 10 mbar pressure applied at 20 min.

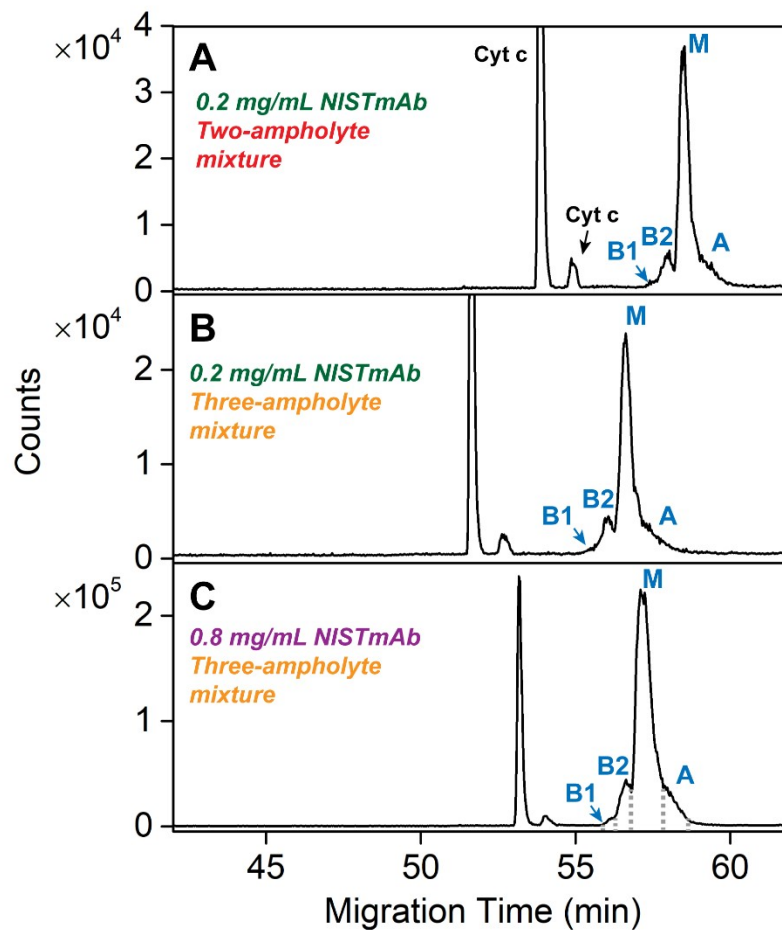

**Figure S4.** (A, B) Comparison of cIEF separation of NISTmAb between using a two-ampholyte mixture and a three-ampholyte mixture. The two-ampholyte mixture contains 1.5% ampholytes with pH range of 3-10 and 8-10.5 (ratio 1:4). The three-ampholyte mixture comprises 2% ampholytes with pH range of 3-10, 5-8 and 8-10.5 (ratio: 1:2:4). (B, C) Comparison of cIEF separation and MS signal of NISTmAb between using 0.2 mg/mL and 0.8 mg/mL sample concentration. Other parameters for separation: 75 cm LPA-coated capillary, 30 cm catholyte plug, 45 cm sample plug, 0.05 mg/mL cytochrome c, 20 kV separation voltage, 10 mbar pressure applied at 20 min.

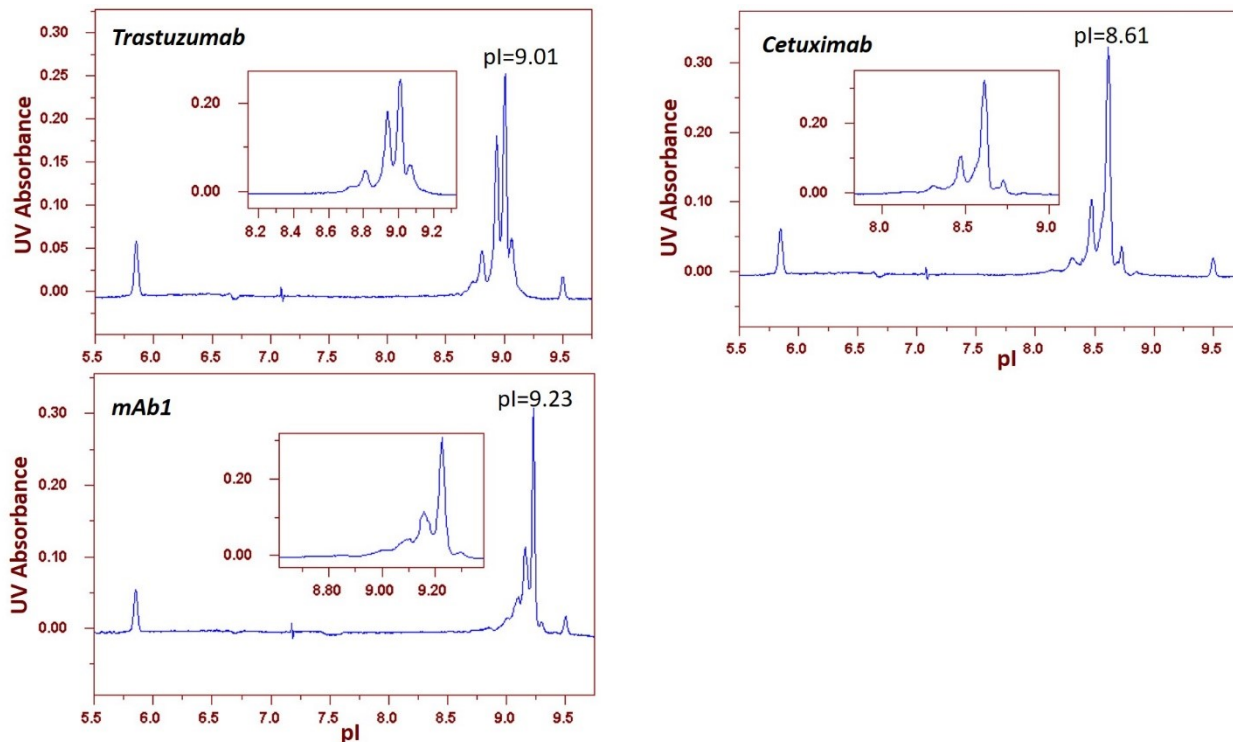

**Figure S5.** icIEF-UV data of three mAbs (trastuzumab, cetuximab, and mAb1). Method conditions are as follows. Cartridge: FC-Coated cIEF Capillary Cartridge, ProteinSimple Catalog No. 101701. Pharmalyte: Pharmalyte 3-10. Final prepared sample: 0.8 M Urea, 0.28% methyl cellulose, 4% carrier ampholytes, 0.2% pI 5.85 marker, 0.2% pI 9.50 marker, ~1.0 mg/mL protein. Focusing period 1: 1500V for 1 min; Focusing period 2: 3000V for 8 min. UV detection wavelength: 280 nm. System: iCE3 (ProteinSimple). All the reagent except Urea were purchased from ProteinSimple. Urea was bought from Sigma.

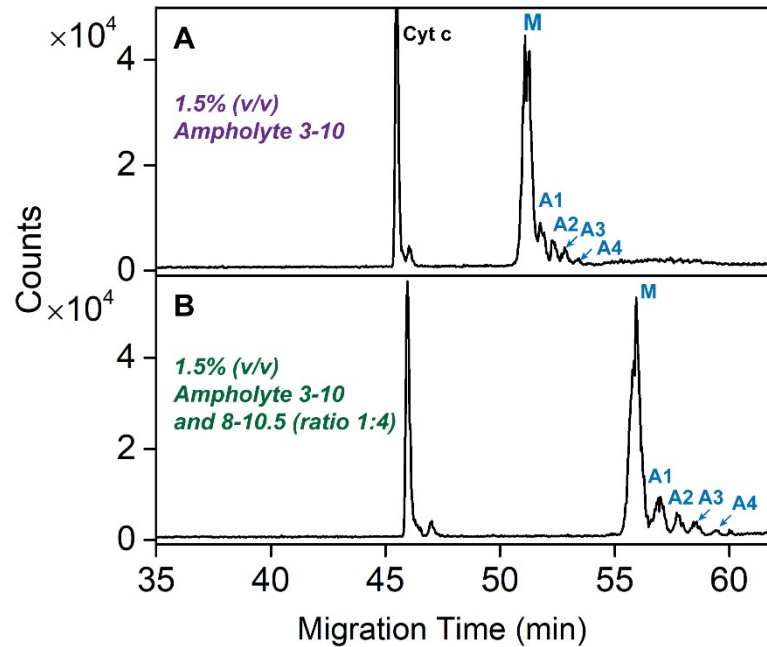

**Figure S6.** Comparison of cIEF separation of cetuximab and cytochrome c between using a single ampholyte (1.5%, pH range of 3-10) (A) and a two-ampholyte mixture (1.5%, pH range of 3-10 and 8-10.5, ratio: 1: 4) (B). Other parameters for separation: 75 cm LPA-coated capillary, 30 cm catholyte plug, 45 cm sample plug, 0.2 mg/mL cetuximab, 20 kV separation voltage, 10 mbar pressure applied at 20 min.



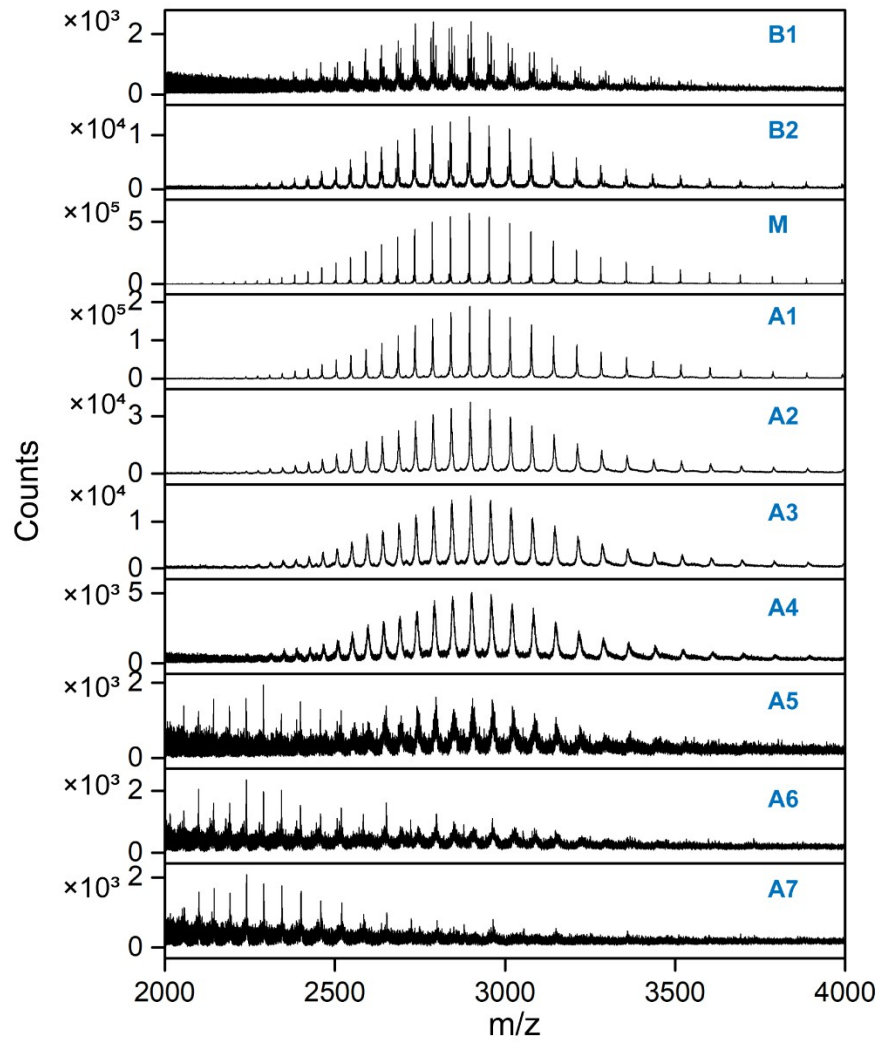

**Figure S7.** Mass spectra of ten charge variants of mAb1.
